# Supplementary material for: Vibrational frequencies, structures, and energetics of the highly challenging alkali metal trifluorides MF3 (M = Li, Na, K, Rb, and Cs)
Source: Royal Society of Chemistry journal article supplement (doi:10.1039/c8cp03434f), 2018-01-01
Supplement: c8cp03434f1.pdf [file c8cp03434f1.pdf]

# Electronic Supplementary Information

Vibrational Frequencies, Structures, and Energetics  
of the Highly Challenging Alkali Metal Trifluorides

$\text{MF}_3$  (M = Li, Na, K, Rb, and Cs)

Zhi Sun and Henry F. Schaefer III\*

*Center for Computational Quantum Chemistry, University of Georgia*

*Athens, Georgia 30602, USA*

*\*E-mail: ccq@uga.edu*

**1. Optimized geometries and harmonic frequencies at the AE-CCSD(T)/AWCVTZ level of theory**

**2. Optimized geometries and harmonic frequencies at the MRCISD+Q(4e,3o)/AVTZ level of theory**

**3. Optimized geometries and harmonic frequencies at the CASPT2(4e,3o)/AVTZ level of theory**

**4. Multireference Diagnostic ( $C_0$ ,  $C_1$ , and  $C_2$  coefficients) at the CASSCF(16e,10o)/AVTZ level of theory**

**5. Optimized geometries and harmonic frequencies of the  $C_{2v}$   $\text{CsF}_3$  at various levels of theory**

## 1. Optimized geometries and harmonic frequencies at the AE-CCSD(T)/AWCVTZ level of theory

### LiF

*Coordinates of optimized geometry:*

F  
Li 1 B1

B1 = 1.568526332545583

*Harmonic vibrational frequencies ( $\text{cm}^{-1}$ ), symmetries, and intensities (in parentheses,  $\text{km mol}^{-1}$ ):*

$\omega_1$   $\sigma_g^+$  905 (152)

### NaF

*Coordinates of optimized geometry:*

F  
Na 1 B1

B1 = 1.933910268288291

*Harmonic vibrational frequencies ( $\text{cm}^{-1}$ ), symmetries, and intensities (in parentheses,  $\text{km mol}^{-1}$ ):*

$\omega_1$   $\sigma_g^+$  531 (70)

### KF

*Coordinates of optimized geometry:*

F  
K 1 B1

B1 = 2.182622917421423

*Harmonic vibrational frequencies (cm<sup>-1</sup>), symmetries, and intensities (in parentheses, km mol<sup>-1</sup>):*

$\omega_1 \sigma_g^+ 424 (105)$

## **RbF**

*Coordinates of optimized geometry:*

F

Rb 1 B1

B1 = 2.285576516424454

*Harmonic vibrational frequencies (cm<sup>-1</sup>), symmetries, and intensities (in parentheses, km mol<sup>-1</sup>):*

$\omega_1 \sigma_g^+ 372 (108)$

## **CsF**

*Coordinates of optimized geometry:*

F

Cs 1 B1

B1 = 2.371104340231122

*Harmonic vibrational frequencies (cm<sup>-1</sup>), symmetries, and intensities (in parentheses, km mol<sup>-1</sup>):*

$\omega_1 \sigma_g^+ 345 (136)$

## **F<sub>2</sub>**

*Coordinates of optimized geometry:*

F

F 1 B1

B1 = 1.416904627285431

*Harmonic vibrational frequencies (cm<sup>-1</sup>), symmetries, and intensities (in parentheses, km mol<sup>-1</sup>):*

$\omega_1$   $\sigma_g^+$  918 (0)

### **F<sub>3</sub><sup>-</sup>**

*Coordinates of optimized geometry:*

F  
F 1 B1  
X 1 B2 2 A1  
F 1 B1 3 A2 2 D1

B1 = 1.737442649354848  
B2 = 2.0000000000000000  
A1 = 90.0000000000000000  
A2 = 90.0000000000000000  
D1 = -180.0000000000000000

*Harmonic vibrational frequencies (cm<sup>-1</sup>), symmetries, and intensities (in parentheses, km mol<sup>-1</sup>):*

$\omega_1$   $\sigma_g^+$  399 (0)  
 $\omega_2$   $\sigma_g^-$  545 (932)  
 $\omega_3$   $\pi_u$  256 (49)  
 $\omega_4$   $\pi_u$  256 (49)

### **LiF<sub>3</sub> (C<sub>s</sub>, <sup>1</sup>A'):** minimum

*Coordinates of optimized geometry:*

F  
F 1 B1  
F 2 B2 1 A2  
Li 3 B3 2 A3 1 D3

B1 = 1.433459972396837  
B2 = 2.491412348924244  
A2 = 160.984768103193318  
B3 = 1.580603483638631  
A3 = 57.372341489243531  
D3 = 0.0000000000000000

*Harmonic vibrational frequencies (cm<sup>-1</sup>), symmetries, and intensities (in parentheses, km mol<sup>-1</sup>):*

$\omega_1$  a' 882 (136)  
 $\omega_2$  a' 839 (13)  
 $\omega_3$  a' 224 (78)  
 $\omega_4$  a' 126 (7)  
 $\omega_5$  a' 70 (80)  
 $\omega_6$  a'' 110 (23)

### **LiF<sub>3</sub> (C<sub>2v</sub>, <sup>1</sup>A<sub>1</sub>): transition state**

*Coordinates of optimized geometry:*

Li  
F 1 B1  
F 2 B2 1 A2  
F 2 B2 1 A2 3 D3

B1 = 1.672718919476552  
B2 = 1.800716098370120  
A2 = 69.889224503827677  
D3 = 180.000000000000000

*Harmonic vibrational frequencies (cm<sup>-1</sup>), symmetries, and intensities (in parentheses, km mol<sup>-1</sup>):*

$\omega_1$  a<sub>1</sub> 723 (101)  
 $\omega_2$  a<sub>1</sub> 364 (1)  
 $\omega_3$  a<sub>1</sub> 172 (18)  
 $\omega_4$  b<sub>1</sub> 199 (32)  
 $\omega_5$  b<sub>2</sub> 530 (45)  
 $\omega_6$  b<sub>2</sub> 146i (9)

### **NaF<sub>3</sub> (C<sub>s</sub>, <sup>1</sup>A', loose-type): minimum**

*Coordinates of optimized geometry:*

F  
F 1 B1  
F 2 B2 1 A2  
Na 3 B3 2 A3 1 D3

B1 = 1.485633875264730  
B2 = 2.139592247668878

A2 = 172.807096080481159  
B3 = 1.965899349108170  
A3 = 69.430579159113520  
D3 = 0.0000000000000000

*Harmonic vibrational frequencies (cm<sup>-1</sup>), symmetries, and intensities (in parentheses, km mol<sup>-1</sup>):*

$\omega_1$  a' 617 (247)  
 $\omega_2$  a' 497 (54)  
 $\omega_3$  a' 238 (17)  
 $\omega_4$  a' 118 (170)  
 $\omega_5$  a' 56 (49)  
 $\omega_6$  a'' 186 (4)

### **NaF<sub>3</sub> (C<sub>s</sub>, <sup>1</sup>A', tight-type): minimum**

*Coordinates of optimized geometry:*

F  
F 1 B1  
F 2 B2 1 A2  
Na 3 B3 2 A3 1 D3

B1 = 1.622994712363500  
B2 = 1.881168429118871  
A2 = 170.546667227019526  
B3 = 2.039533156416951  
A3 = 65.739630248246584  
D3 = 0.0000000000000000

*Harmonic vibrational frequencies (cm<sup>-1</sup>), symmetries, and intensities (in parentheses, km mol<sup>-1</sup>):*

$\omega_1$  a' 481 (329)  
 $\omega_2$  a' 424 (101)  
 $\omega_3$  a' 350 (19)  
 $\omega_4$  a' 268 (327)  
 $\omega_5$  a' 78 (14)  
 $\omega_6$  a'' 233 (2)

### **NaF<sub>3</sub> (C<sub>2v</sub>, <sup>1</sup>A<sub>1</sub>): transition state**

*Coordinates of optimized geometry:*

Na  
F 1 B1  
F 2 B2 1 A2  
F 2 B2 1 A2 3 D3

B1 = 2.013331718504131  
B2 = 1.765561299912435  
A2 = 76.333929692915177  
D3 = 180.000000000000000

*Harmonic vibrational frequencies (cm<sup>-1</sup>), symmetries, and intensities (in parentheses, km mol<sup>-1</sup>):*

$\omega_1$  a<sub>1</sub> 462 (28)  
 $\omega_2$  a<sub>1</sub> 381 (0)  
 $\omega_3$  a<sub>1</sub> 193 (27)  
 $\omega_4$  b<sub>1</sub> 209 (4)  
 $\omega_5$  b<sub>2</sub> 568 (202)  
 $\omega_6$  b<sub>2</sub> 13i (3)

### **KF<sub>3</sub> (C<sub>2v</sub>, <sup>1</sup>A<sub>1</sub>): minimum**

*Coordinates of optimized geometry:*

K  
F 1 B1  
F 2 B2 1 A2  
F 2 B2 1 A2 3 D3

B1 = 2.307896606373894  
B2 = 1.752415759745316  
A2 = 79.578562394148832  
D3 = 180.000000000000000

*Harmonic vibrational frequencies (cm<sup>-1</sup>), symmetries, and intensities (in parentheses, km mol<sup>-1</sup>):*

$\omega_1$  a<sub>1</sub> 405 (12)  
 $\omega_2$  a<sub>1</sub> 373 (8)  
 $\omega_3$  a<sub>1</sub> 197 (34)  
 $\omega_4$  b<sub>1</sub> 224 (2)  
 $\omega_5$  b<sub>2</sub> 581 (257)  
 $\omega_6$  b<sub>2</sub> 66 (2)



## RbF<sub>3</sub> (C<sub>2v</sub>, <sup>1</sup>A<sub>1</sub>): minimum

*Coordinates of optimized geometry:*

Rb

F 1 B1

F 2 B2 1 A2

F 2 B2 1 A2 3 D3

B1 = 2.437070539899721

B2 = 1.749857742572373

A2 = 80.479054725695136

D3 = 180.000000000000000

*Harmonic vibrational frequencies (cm<sup>-1</sup>), symmetries, and intensities (in parentheses, km mol<sup>-1</sup>):*

$\omega_1$  a<sub>1</sub> 398 (4)

$\omega_2$  a<sub>1</sub> 350 (6)

$\omega_3$  a<sub>1</sub> 175 (33)

$\omega_4$  b<sub>1</sub> 227 (1)

$\omega_5$  b<sub>2</sub> 583 (262)

$\omega_6$  b<sub>2</sub> 66 (3)

## CsF<sub>3</sub> (C<sub>2v</sub>, <sup>1</sup>A<sub>1</sub>): minimum

*Coordinates of optimized geometry:*

Cs

F 1 B1

F 2 B2 1 A2

F 2 B2 1 A2 3 D3

B1 = 2.588113836758844

B2 = 1.747714890956563

A2 = 81.559488676289149

D3 = 180.000000000000000

*Harmonic vibrational frequencies (cm<sup>-1</sup>), symmetries, and intensities (in parentheses, km mol<sup>-1</sup>):*

$\omega_1$  a<sub>1</sub> 396 (3)

$\omega_2$  a<sub>1</sub> 333 (5)

$\omega_3$  a<sub>1</sub> 165 (36)

$\omega_4$  b<sub>1</sub> 231 (1)

$\omega_5$   $b_2$  587 (255)  
 $\omega_6$   $b_2$  63 (3)

### **CsF<sub>3</sub> (C<sub>s</sub>, <sup>1</sup>A'):** minimum

*Coordinates of optimized geometry:*

Cs  
F 1 B1  
F 2 B2 1 A2  
F 2 B3 1 A3 3 D3

B1 = 3.123421706185294  
B2 = 2.246883223355252  
A2 = 50.107247644301026  
B3 = 1.455154196034556  
A3 = 124.346838599510249  
D3 = 180.000000000000000

*Harmonic vibrational frequencies (cm<sup>-1</sup>), symmetries, and intensities (in parentheses, km mol<sup>-1</sup>):*

$\omega_1$   $a'$  748 (91)  
 $\omega_2$   $a'$  330 (110)  
 $\omega_3$   $a'$  178 (11)  
 $\omega_4$   $a'$  127 (80)  
 $\omega_5$   $a'$  44 (3)  
 $\omega_6$   $a''$  160 (2)

## 2. Optimized geometries and harmonic frequencies at the MRCISD+Q(4e,3o)/AVTZ level of theory

### LiF<sub>3</sub> (C<sub>2v</sub>, <sup>1</sup>A<sub>1</sub>): transition state

*Coordinates of optimized geometry:*

|    |              |               |               |
|----|--------------|---------------|---------------|
| Li | 0.0000000000 | 0.0000000000  | -1.1834165306 |
| F  | 0.0000000000 | 0.0000000000  | 0.5139248764  |
| F  | 0.0000000000 | 1.6561404149  | -0.0407838957 |
| F  | 0.0000000000 | -1.6561404149 | -0.0407838957 |

*Harmonic vibrational frequencies (cm<sup>-1</sup>), symmetries, and intensities (in parentheses, km mol<sup>-1</sup>):*

|            |                       |                  |
|------------|-----------------------|------------------|
| $\omega_1$ | <i>a</i> <sub>1</sub> | 713 (131)        |
| $\omega_2$ | <i>a</i> <sub>1</sub> | 549 (2)          |
| $\omega_3$ | <i>a</i> <sub>1</sub> | 196 (12)         |
| $\omega_4$ | <i>b</i> <sub>1</sub> | 223 (0)          |
| $\omega_5$ | <i>b</i> <sub>2</sub> | 706 (4)          |
| $\omega_6$ | <i>b</i> <sub>2</sub> | 355 <i>i</i> (3) |

### NaF<sub>3</sub> (C<sub>2v</sub>, <sup>1</sup>A<sub>1</sub>): transition state

*Coordinates of optimized geometry:*

|    |              |               |               |
|----|--------------|---------------|---------------|
| Na | 0.0000000000 | 0.0000000000  | -1.4850604688 |
| F  | 0.0000000000 | 0.0000000000  | 0.8040477503  |
| F  | 0.0000000000 | 1.7559369822  | 0.4965084256  |
| F  | 0.0000000000 | -1.7559369822 | 0.4965084256  |

*Harmonic vibrational frequencies (cm<sup>-1</sup>), symmetries, and intensities (in parentheses, km mol<sup>-1</sup>):*

|            |                       |                  |
|------------|-----------------------|------------------|
| $\omega_1$ | <i>a</i> <sub>1</sub> | 846 (34)         |
| $\omega_2$ | <i>a</i> <sub>1</sub> | 384 (18)         |
| $\omega_3$ | <i>a</i> <sub>1</sub> | 196 (14)         |
| $\omega_4$ | <i>b</i> <sub>1</sub> | 204 (0)          |
| $\omega_5$ | <i>b</i> <sub>2</sub> | 689 (0)          |
| $\omega_6$ | <i>b</i> <sub>2</sub> | 88 <i>i</i> (13) |

### **KF<sub>3</sub> (C<sub>2v</sub>, <sup>1</sup>A<sub>1</sub>): minimum**

*Coordinates of optimized geometry:*

|   |              |               |               |
|---|--------------|---------------|---------------|
| K | 0.0000000000 | 0.0000000000  | -1.2201346498 |
| F | 0.0000000000 | 0.0000000000  | 1.0601539788  |
| F | 0.0000000000 | 1.6992570846  | 0.7254282912  |
| F | 0.0000000000 | -1.6992570846 | 0.7254282912  |

*Harmonic vibrational frequencies (cm<sup>-1</sup>), symmetries, and intensities (in parentheses, km mol<sup>-1</sup>):*

|            |                       |          |
|------------|-----------------------|----------|
| $\omega_1$ | <i>a</i> <sub>1</sub> | 488 (9)  |
| $\omega_2$ | <i>a</i> <sub>1</sub> | 403 (20) |
| $\omega_3$ | <i>a</i> <sub>1</sub> | 210 (29) |
| $\omega_4$ | <i>b</i> <sub>1</sub> | 231 (0)  |
| $\omega_5$ | <i>b</i> <sub>2</sub> | 602 (10) |
| $\omega_6$ | <i>b</i> <sub>2</sub> | 69 (23)  |

### **RbF<sub>3</sub> (C<sub>2v</sub>, <sup>1</sup>A<sub>1</sub>): minimum**

*Coordinates of optimized geometry:*

|    |              |               |               |
|----|--------------|---------------|---------------|
| Rb | 0.0000000000 | 0.0000000000  | -0.8859025700 |
| F  | 0.0000000000 | 0.0000000000  | 1.5306118596  |
| F  | 0.0000000000 | 1.7039946530  | 1.2273916584  |
| F  | 0.0000000000 | -1.7039946530 | 1.2273916584  |

*Harmonic vibrational frequencies (cm<sup>-1</sup>), symmetries, and intensities (in parentheses, km mol<sup>-1</sup>):*

|            |                       |          |
|------------|-----------------------|----------|
| $\omega_1$ | <i>a</i> <sub>1</sub> | 481 (5)  |
| $\omega_2$ | <i>a</i> <sub>1</sub> | 369 (11) |
| $\omega_3$ | <i>a</i> <sub>1</sub> | 188 (30) |
| $\omega_4$ | <i>b</i> <sub>1</sub> | 234 (0)  |
| $\omega_5$ | <i>b</i> <sub>2</sub> | 590 (15) |
| $\omega_6$ | <i>b</i> <sub>2</sub> | 105 (26) |

### **CsF<sub>3</sub> (C<sub>2v</sub>, <sup>1</sup>A<sub>1</sub>): minimum**

*Coordinates of optimized geometry:*

|    |              |              |               |
|----|--------------|--------------|---------------|
| Cs | 0.0000000000 | 0.0000000000 | -0.7235432115 |
| F  | 0.0000000000 | 0.0000000000 | 1.8583396873  |

|   |              |               |              |
|---|--------------|---------------|--------------|
| F | 0.0000000000 | 1.7082596726  | 1.6016428761 |
| F | 0.0000000000 | -1.7082596726 | 1.6016428761 |

*Harmonic vibrational frequencies (cm<sup>-1</sup>), symmetries, and intensities (in parentheses, km mol<sup>-1</sup>):*

|            |       |          |
|------------|-------|----------|
| $\omega_1$ | $a_1$ | 478 (3)  |
| $\omega_2$ | $a_1$ | 347 (9)  |
| $\omega_3$ | $a_1$ | 173 (35) |
| $\omega_4$ | $b_1$ | 240 (0)  |
| $\omega_5$ | $b_2$ | 588 (20) |
| $\omega_6$ | $b_2$ | 104 (24) |

### 3. Optimized geometries and harmonic frequencies at the CASPT2(4e,3o)/AVTZ level of theory

#### LiF<sub>3</sub> (C<sub>2v</sub>, <sup>1</sup>A<sub>1</sub>): transition state

*Coordinates of optimized geometry:*

|    |              |               |               |
|----|--------------|---------------|---------------|
| Li | 0.0000000000 | 0.0000000000  | -1.1886666724 |
| F  | 0.0000000000 | 0.0000000000  | 0.5384993718  |
| F  | 0.0000000000 | 1.6487474878  | -0.0521120830 |
| F  | 0.0000000000 | -1.6487474878 | -0.0521120830 |

*Harmonic vibrational frequencies (cm<sup>-1</sup>), symmetries, and intensities (in parentheses, km mol<sup>-1</sup>):*

|            |                       |            |
|------------|-----------------------|------------|
| $\omega_1$ | <i>a</i> <sub>1</sub> | 695 (0)    |
| $\omega_2$ | <i>a</i> <sub>1</sub> | 656 (148)  |
| $\omega_3$ | <i>a</i> <sub>1</sub> | 196 (33)   |
| $\omega_4$ | <i>b</i> <sub>1</sub> | 221 (40)   |
| $\omega_5$ | <i>b</i> <sub>2</sub> | 712 (282)  |
| $\omega_6$ | <i>b</i> <sub>2</sub> | 386i (705) |

#### NaF<sub>3</sub> (C<sub>2v</sub>, <sup>1</sup>A<sub>1</sub>): transition state

*Coordinates of optimized geometry:*

|    |              |               |               |
|----|--------------|---------------|---------------|
| Na | 0.0000000000 | 0.0000000000  | -1.4729429298 |
| F  | 0.0000000000 | 0.0000000000  | 0.8258265084  |
| F  | 0.0000000000 | 1.7545236772  | 0.4782873584  |
| F  | 0.0000000000 | -1.7545236772 | 0.4782873584  |

*Harmonic vibrational frequencies (cm<sup>-1</sup>), symmetries, and intensities (in parentheses, km mol<sup>-1</sup>):*

|            |                       |            |
|------------|-----------------------|------------|
| $\omega_1$ | <i>a</i> <sub>1</sub> | 879 (1318) |
| $\omega_2$ | <i>a</i> <sub>1</sub> | 428 (310)  |
| $\omega_3$ | <i>a</i> <sub>1</sub> | 195 (52)   |
| $\omega_4$ | <i>b</i> <sub>1</sub> | 198 (3)    |
| $\omega_5$ | <i>b</i> <sub>2</sub> | 679 (457)  |
| $\omega_6$ | <i>b</i> <sub>2</sub> | 117i (20)  |

### **KF<sub>3</sub> (C<sub>2v</sub>, <sup>1</sup>A<sub>1</sub>): minimum**

*Coordinates of optimized geometry:*

|   |              |               |               |
|---|--------------|---------------|---------------|
| K | 0.0000000000 | 0.0000000000  | -1.2123995093 |
| F | 0.0000000000 | 0.0000000000  | 1.0704270776  |
| F | 0.0000000000 | 1.7115314919  | 0.7123323663  |
| F | 0.0000000000 | -1.7115314919 | 0.7123323663  |

*Harmonic vibrational frequencies (cm<sup>-1</sup>), symmetries, and intensities (in parentheses, km mol<sup>-1</sup>):*

|            |       |            |
|------------|-------|------------|
| $\omega_1$ | $a_1$ | 538 (0)    |
| $\omega_2$ | $a_1$ | 394 (21)   |
| $\omega_3$ | $a_1$ | 208 (35)   |
| $\omega_4$ | $b_1$ | 217 (2)    |
| $\omega_5$ | $b_2$ | 623 (1629) |
| $\omega_6$ | $b_2$ | 95 (0)     |

### **RbF<sub>3</sub> (C<sub>2v</sub>, <sup>1</sup>A<sub>1</sub>): minimum**

*Coordinates of optimized geometry:*

|    |              |               |               |
|----|--------------|---------------|---------------|
| Rb | 0.0000000000 | 0.0000000000  | -0.8798399369 |
| F  | 0.0000000000 | 0.0000000000  | 1.5365168271  |
| F  | 0.0000000000 | 1.7175310472  | 1.2108022411  |
| F  | 0.0000000000 | -1.7175310472 | 1.2108022411  |

*Harmonic vibrational frequencies (cm<sup>-1</sup>), symmetries, and intensities (in parentheses, km mol<sup>-1</sup>):*

|            |       |            |
|------------|-------|------------|
| $\omega_1$ | $a_1$ | 529 (0)    |
| $\omega_2$ | $a_1$ | 359 (10)   |
| $\omega_3$ | $a_1$ | 188 (34)   |
| $\omega_4$ | $b_1$ | 220 (1)    |
| $\omega_5$ | $b_2$ | 612 (1545) |
| $\omega_6$ | $b_2$ | 118 (4)    |

### **CsF<sub>3</sub> (C<sub>2v</sub>, <sup>1</sup>A<sub>1</sub>): minimum**

*Coordinates of optimized geometry:*

|    |              |              |               |
|----|--------------|--------------|---------------|
| Cs | 0.0000000000 | 0.0000000000 | -0.7167370682 |
|----|--------------|--------------|---------------|

|   |              |               |              |
|---|--------------|---------------|--------------|
| F | 0.0000000000 | 0.0000000000  | 1.8575417801 |
| F | 0.0000000000 | 1.7230407308  | 1.5782352711 |
| F | 0.0000000000 | -1.7230407308 | 1.5782352711 |

*Harmonic vibrational frequencies (cm<sup>-1</sup>), symmetries, and intensities (in parentheses, km mol<sup>-1</sup>):*

|            |       |            |
|------------|-------|------------|
| $\omega_1$ | $a_1$ | 526 (0)    |
| $\omega_2$ | $a_1$ | 338 (8)    |
| $\omega_3$ | $a_1$ | 174 (38)   |
| $\omega_4$ | $b_1$ | 225 (1)    |
| $\omega_5$ | $b_2$ | 611 (1348) |
| $\omega_6$ | $b_2$ | 114 (8)    |



**4. Multireference Diagnostic ( $C_0$ ,  $C_1$ , and  $C_2$  coefficients) at the CASSCF(16e,10o)/AVTZ level of theory**

| Species                                         | $C_0$    | $C_1$     | $C_2$    | $C_0^2$ | $C_1^2$ | $C_2^2$ |
|-------------------------------------------------|----------|-----------|----------|---------|---------|---------|
| LiF <sub>3</sub> ( $C_s$ , $^1A'$ )             | 0.964116 | 0.2430709 | –        | 0.93    | 0.06    | –       |
| LiF <sub>3</sub> ( $C_{2v}$ , $^1A_1$ )         | 0.873829 | 0.4568559 | 0.113757 | 0.76    | 0.21    | 0.01    |
| NaF <sub>3</sub> ( $C_s$ , $^1A'$ , loose type) | 0.951928 | 0.2903616 | 0.075057 | 0.91    | 0.08    | 0.01    |
| NaF <sub>3</sub> ( $C_s$ , $^1A'$ , tight type) | 0.934912 | 0.3376876 | 0.051117 | 0.87    | 0.11    | 0.00    |
| NaF <sub>3</sub> ( $C_{2v}$ , $^1A_1$ )         | 0.911969 | 0.3683825 | 0.132125 | 0.83    | 0.14    | 0.02    |
| KF <sub>3</sub> ( $C_{2v}$ , $^1A_1$ )          | 0.911490 | 0.3704887 | 0.131562 | 0.83    | 0.14    | 0.02    |
| RbF <sub>3</sub> ( $C_{2v}$ , $^1A_1$ )         | 0.921691 | 0.3377843 | 0.142495 | 0.85    | 0.11    | 0.02    |
| CsF <sub>3</sub> ( $C_{2v}$ , $^1A_1$ )         | 0.922366 | 0.3362211 | 0.141855 | 0.85    | 0.11    | 0.02    |
| CsF <sub>3</sub> ( $C_s$ , $^1A'$ )             | 0.961448 | 0.2547246 | –        | 0.92    | 0.06    | –       |

## 5. Optimized geometries and harmonic frequencies of the $C_{2v}$ $CsF_3$ at various levels of theory

### - CCSD(T)/AVTZ:

*Coordinates of optimized geometry:*

|    |           |           |           |
|----|-----------|-----------|-----------|
| Cs | -0.000000 | 0.000000  | 0.717615  |
| F  | -0.000000 | 0.000000  | -1.854606 |
| F  | -0.000000 | 1.726153  | -1.582775 |
| F  | 0.000000  | -1.726153 | -1.582775 |

*Harmonic vibrational frequencies ( $cm^{-1}$ ), symmetries, and intensities (in parentheses,  $km\ mol^{-1}$ ):*

|            |       |           |
|------------|-------|-----------|
| $\omega_1$ | $a_1$ | 398 (4)   |
| $\omega_2$ | $a_1$ | 341 (7)   |
| $\omega_3$ | $a_1$ | 171 (35)  |
| $\omega_4$ | $b_1$ | 227 (1)   |
| $\omega_5$ | $b_2$ | 622 (270) |
| $\omega_6$ | $b_2$ | 70 (4)    |

### - CCSDT/AVTZ:

*Coordinates of optimized geometry:*

|    |               |               |               |
|----|---------------|---------------|---------------|
| Cs | 0.0000000000  | 0.0000000000  | -0.7190876366 |
| F  | 0.0000000000  | 0.0000000000  | 1.8551419686  |
| F  | -0.0000000000 | 1.7201515486  | 1.5876579586  |
| F  | 0.0000000000  | -1.7201515486 | 1.5876579586  |

*Harmonic vibrational frequencies ( $cm^{-1}$ ) and symmetries:*

|            |       |     |
|------------|-------|-----|
| $\omega_1$ | $a_1$ | 415 |
| $\omega_2$ | $a_1$ | 342 |
| $\omega_3$ | $a_1$ | 172 |
| $\omega_4$ | $b_1$ | 229 |
| $\omega_5$ | $b_2$ | 605 |
| $\omega_6$ | $b_2$ | 64  |

### - CCSDT(Q)/AVTZ:

*Coordinates of optimized geometry:*

|    |               |               |               |
|----|---------------|---------------|---------------|
| Cs | 0.0000000000  | 0.0000000000  | -0.7156715860 |
| F  | 0.0000000000  | 0.0000000000  | 1.8573904620  |
| F  | -0.0000000000 | 1.7364598360  | 1.5745850301  |
| F  | 0.0000000000  | -1.7364598360 | 1.5745850301  |

*Harmonic vibrational frequencies (cm<sup>-1</sup>) and symmetries:*

|            |       |     |
|------------|-------|-----|
| $\omega_1$ | $a_1$ | 385 |
| $\omega_2$ | $a_1$ | 332 |
| $\omega_3$ | $a_1$ | 169 |
| $\omega_4$ | $b_1$ | 214 |
| $\omega_5$ | $b_2$ | 572 |
| $\omega_6$ | $b_2$ | 74  |

### - CASPT2(4e,3o)/AVTZ:

*Coordinates of optimized geometry:*

|    |              |               |               |
|----|--------------|---------------|---------------|
| Cs | 0.0000000000 | 0.0000000000  | -0.7167370682 |
| F  | 0.0000000000 | 0.0000000000  | 1.8575417801  |
| F  | 0.0000000000 | 1.7230407308  | 1.5782352711  |
| F  | 0.0000000000 | -1.7230407308 | 1.5782352711  |

*Harmonic vibrational frequencies (cm<sup>-1</sup>) and symmetries:*

|            |       |     |
|------------|-------|-----|
| $\omega_1$ | $a_1$ | 526 |
| $\omega_2$ | $a_1$ | 338 |
| $\omega_3$ | $a_1$ | 174 |
| $\omega_4$ | $b_1$ | 225 |
| $\omega_5$ | $b_2$ | 611 |
| $\omega_6$ | $b_2$ | 114 |

**- CASPT3(4e,3o)/AVTZ:**

*Coordinates of optimized geometry:*

|    |              |               |               |
|----|--------------|---------------|---------------|
| Cs | 0.0000000000 | 0.0000000000  | -0.7251856839 |
| F  | 0.0000000000 | 0.0000000000  | 1.8604005595  |
| F  | 0.0000000000 | 1.6939907824  | 1.6063574878  |
| F  | 0.0000000000 | -1.6939907824 | 1.6063574878  |

*Harmonic vibrational frequencies (cm<sup>-1</sup>) and symmetries:*

|            |       |     |
|------------|-------|-----|
| $\omega_1$ | $a_1$ | 515 |
| $\omega_2$ | $a_1$ | 354 |
| $\omega_3$ | $a_1$ | 176 |
| $\omega_4$ | $b_1$ | 251 |
| $\omega_5$ | $b_2$ | 521 |
| $\omega_6$ | $b_2$ | 115 |

**- MRCISD+Q(4e,3o)/AVTZ:**

*Coordinates of optimized geometry:*

|    |              |               |               |
|----|--------------|---------------|---------------|
| Cs | 0.0000000000 | 0.0000000000  | -0.7235432115 |
| F  | 0.0000000000 | 0.0000000000  | 1.8583396873  |
| F  | 0.0000000000 | 1.7082596726  | 1.6016428761  |
| F  | 0.0000000000 | -1.7082596726 | 1.6016428761  |

*Harmonic vibrational frequencies (cm<sup>-1</sup>) and symmetries:*

|            |       |     |
|------------|-------|-----|
| $\omega_1$ | $a_1$ | 478 |
| $\omega_2$ | $a_1$ | 347 |
| $\omega_3$ | $a_1$ | 173 |
| $\omega_4$ | $b_1$ | 240 |
| $\omega_5$ | $b_2$ | 588 |
| $\omega_6$ | $b_2$ | 104 |
